# Supplementary material for: The spatiotemporal pattern of earthworm community in the grass savannas of Lamto (Ivory Coast)
Source: Biodivers Data J. 2015 Nov 13;(3):e6515. doi: 10.3897/BDJ.3.e6515 (PMC4678800; doi:10.3897/BDJ.3.e6515)
Supplement: Supplementary material 1 — Earthworm community in upper soil of a grass savanna in Lamto (Ivory Coast) [file biodiversity_data_journal-3-e6515-s001.xls]

## Sheet: metadata
title	Earthworm community in upper soil of a grass savanna in Lamto (Côte d'Ivoire)
General Keywords	earthworm community, grass savanna, humid tropics, Côte d'Ivoire, west Africa
Begin Date	november 1995
End Date	june 1997
The data were collected in Lamto, Côte d'Ivoire			Latitude	Longitude
			6°13’N	5°02’W
Sampling unit: soil monoliths of 25 (length) × 25 (width) × 10 cm (depth) soil monolith
Sampling scheme: 10 × 10 grid of sampling points
Repetitions: the grid was sampled on 5 occasions (May and November 1995, June and December 1996 and June 1997)
Sampling coordinates are given in meters

## Sheet: Grass savanna - May 1995
			counts: individuals per sampling unit	counts: individuals per sampling unit	counts: individuals per sampling unit	counts: individuals per sampling unit	counts: individuals per sampling unit	counts: individuals per sampling unit	counts: individuals per sampling unit	counts: individuals per sampling unit	counts: individuals per sampling unit	counts: individuals per sampling unit	abundance: individuals per m2	abundance: individuals per m2	abundance: individuals per m2	abundance: individuals per m2	abundance: individuals per m2	abundance: individuals per m2	abundance: individuals per m2	abundance: individuals per m2	abundance: individuals per m2	abundance: individuals per m2
sampling point	x coordinates (m)	y coordinates (m)	Eudriliae	Millsonia anomala (adults)	Millsonia anomala (subadults)	Millsonia anomala (juveniles)	Millsonia anomala (cocoons)	Dichogaster agilis (adults)	Dichogaster agilis (subadults)	Dichogaster agilis (juveniles)	Agastrodrilus sp.	other	Eudriliae	Millsonia anomala (adults)	Millsonia anomala (subadults)	Millsonia anomala (juveniles)	Millsonia anomala (cocoons)	Dichogaster agilis (adults)	Dichogaster agilis (subadults)	Dichogaster agilis (juveniles)	Agastrodrilus sp.	other
1	2.5	2.5	1	0	0	0	0	2	0	0	0	0	16	0	0	0	0	32	0	0	0	0
2	2.5	7.5	9	0	0	2	0	0	0	0	0	0	144	0	0	32	0	0	0	0	0	0
3	2.5	12.5	11	0	0	1	0	0	0	0	0	0	176	0	0	16	0	0	0	0	0	0
4	2.5	17.5	4	0	1	0	0	0	0	0	0	0	64	0	16	0	0	0	0	0	0	0
5	2.5	22.5	6	0	0	0	0	0	0	0	0	0	96	0	0	0	0	0	0	0	0	0
6	2.5	27.5	3	0	0	2	0	0	0	0	0	0	48	0	0	32	0	0	0	0	0	0
7	2.5	32.5	8	0	0	1	0	0	2	0	0	0	128	0	0	16	0	0	32	0	0	0
8	2.5	37.5	0	0	1	1	0	0	0	0	0	0	0	0	16	16	0	0	0	0	0	0
9	2.5	42.5	5	0	0	0	0	1	0	1	0	0	80	0	0	0	0	16	0	16	0	0
10	2.5	47.5	1	0	1	0	0	1	0	0	0	0	16	0	16	0	0	16	0	0	0	0
11	7.5	2.5	0	0	1	2	0	0	0	0	0	0	0	0	16	32	0	0	0	0	0	0
12	7.5	7.5	3	0	0	0	0	0	2	0	0	0	48	0	0	0	0	0	32	0	0	0
13	7.5	12.5	2	1	0	0	0	0	0	0	0	0	32	16	0	0	0	0	0	0	0	0
14	7.5	17.5	7	0	2	0	0	0	0	0	0	0	112	0	32	0	0	0	0	0	0	0
15	7.5	22.5	3	1	1	0	0	0	0	1	0	0	48	16	16	0	0	0	0	16	0	0
16	7.5	27.5	12	0	1	0	0	0	0	0	0	0	192	0	16	0	0	0	0	0	0	0
17	7.5	32.5	0	0	1	0	0	0	0	0	0	0	0	0	16	0	0	0	0	0	0	0
18	7.5	37.5	0	0	1	0	0	0	0	0	0	0	0	0	16	0	0	0	0	0	0	0
19	7.5	42.5	2	0	0	2	0	0	0	0	0	0	32	0	0	32	0	0	0	0	0	0
20	7.5	47.5	7	0	0	0	0	0	0	0	0	0	112	0	0	0	0	0	0	0	0	0
21	12.5	2.5	5	0	2	0	0	0	0	0	0	0	80	0	32	0	0	0	0	0	0	0
22	12.5	7.5	11	0	0	1	0	0	2	0	0	0	176	0	0	16	0	0	32	0	0	0
23	12.5	12.5	4	0	0	1	0	0	0	0	0	0	64	0	0	16	0	0	0	0	0	0
24	12.5	17.5	3	0	0	0	0	0	0	0	0	0	48	0	0	0	0	0	0	0	0	0
25	12.5	22.5	0	0	0	1	0	0	0	0	0	0	0	0	0	16	0	0	0	0	0	0
26	12.5	27.5	5	0	0	0	0	0	0	0	0	0	80	0	0	0	0	0	0	0	0	0
27	12.5	32.5	6	0	0	0	0	0	0	0	0	0	96	0	0	0	0	0	0	0	0	0
28	12.5	37.5	5	0	0	1	0	0	0	0	0	0	80	0	0	16	0	0	0	0	0	0
29	12.5	42.5	3	0	0	0	0	0	0	0	0	0	48	0	0	0	0	0	0	0	0	0
30	12.5	47.5	1	1	0	5	0	0	0	0	0	0	16	16	0	80	0	0	0	0	0	0
31	17.5	2.5	9	0	0	0	0	0	2	0	0	0	144	0	0	0	0	0	32	0	0	0
32	17.5	7.5	3	0	0	1	0	0	1	0	0	0	48	0	0	16	0	0	16	0	0	0
33	17.5	12.5	3	0	0	1	0	0	0	0	0	0	48	0	0	16	0	0	0	0	0	0
34	17.5	17.5	1	0	0	0	0	0	0	0	0	0	16	0	0	0	0	0	0	0	0	0
35	17.5	22.5	0	0	1	0	0	0	0	0	0	0	0	0	16	0	0	0	0	0	0	0
36	17.5	27.5	2	1	0	0	0	0	0	0	0	0	32	16	0	0	0	0	0	0	0	0
37	17.5	32.5	1	0	1	0	0	0	0	0	0	0	16	0	16	0	0	0	0	0	0	0
38	17.5	37.5	1	0	0	0	0	0	0	0	0	0	16	0	0	0	0	0	0	0	0	0
39	17.5	42.5	0	1	0	3	0	0	0	0	0	0	0	16	0	48	0	0	0	0	0	0
40	17.5	47.5	1	0	1	0	0	0	0	0	0	0	16	0	16	0	0	0	0	0	0	0
41	22.5	2.5	6	0	0	1	0	0	0	0	0	0	96	0	0	16	0	0	0	0	0	0
42	22.5	7.5	9	0	0	1	0	0	0	0	0	0	144	0	0	16	0	0	0	0	0	0
43	22.5	12.5	2	0	0	0	0	0	0	0	0	0	32	0	0	0	0	0	0	0	0	0
44	22.5	17.5	0	1	1	0	0	0	0	0	0	0	0	16	16	0	0	0	0	0	0	0
45	22.5	22.5	4	0	1	2	0	0	0	0	0	0	64	0	16	32	0	0	0	0	0	0
46	22.5	27.5	0	0	0	0	0	0	0	0	0	0	0	0	0	0	0	0	0	0	0	0
47	22.5	32.5	5	0	0	1	0	0	0	0	0	0	80	0	0	16	0	0	0	0	0	0
48	22.5	37.5	0	0	0	0	0	0	0	0	0	0	0	0	0	0	0	0	0	0	0	0
49	22.5	42.5	0	0	0	0	0	0	0	0	0	0	0	0	0	0	0	0	0	0	0	0
50	22.5	47.5	5	0	1	2	0	0	0	0	0	0	80	0	16	32	0	0	0	0	0	0
51	27.5	2.5	5	0	0	0	0	0	0	0	0	0	80	0	0	0	0	0	0	0	0	0
52	27.5	7.5	2	0	1	0	0	0	0	0	0	0	32	0	16	0	0	0	0	0	0	0
53	27.5	12.5	0	0	1	0	0	0	0	0	0	0	0	0	16	0	0	0	0	0	0	0
54	27.5	17.5	1	0	1	0	0	0	0	0	0	0	16	0	16	0	0	0	0	0	0	0
55	27.5	22.5	4	0	0	0	0	0	0	0	0	0	64	0	0	0	0	0	0	0	0	0
56	27.5	27.5	5	1	1	1	0	0	0	0	0	0	80	16	16	16	0	0	0	0	0	0
57	27.5	32.5	0	0	0	0	0	0	0	0	0	0	0	0	0	0	0	0	0	0	0	0
58	27.5	37.5	4	1	0	0	0	0	0	1	0	0	64	16	0	0	0	0	0	16	0	0
59	27.5	42.5	4	0	0	2	0	0	0	0	0	0	64	0	0	32	0	0	0	0	0	0
60	27.5	47.5	0	1	0	0	0	0	0	0	0	0	0	16	0	0	0	0	0	0	0	0
61	32.5	2.5	3	0	0	0	0	0	0	0	0	0	48	0	0	0	0	0	0	0	0	0
62	32.5	7.5	3	0	0	0	0	0	0	0	0	0	48	0	0	0	0	0	0	0	0	0
63	32.5	12.5	0	1	0	0	0	0	0	0	0	0	0	16	0	0	0	0	0	0	0	0
64	32.5	17.5	0	0	0	0	0	0	0	0	0	0	0	0	0	0	0	0	0	0	0	0
65	32.5	22.5	2	0	0	0	0	0	0	0	0	0	32	0	0	0	0	0	0	0	0	0
66	32.5	27.5	4	1	0	0	0	0	0	0	0	0	64	16	0	0	0	0	0	0	0	0
67	32.5	32.5	1	1	0	1	0	0	0	0	0	0	16	16	0	16	0	0	0	0	0	0
68	32.5	37.5	2	1	0	1	0	0	0	0	0	0	32	16	0	16	0	0	0	0	0	0
69	32.5	42.5	1	1	0	1	0	0	0	0	0	0	16	16	0	16	0	0	0	0	0	0
70	32.5	47.5	0	0	0	1	0	0	0	0	0	0	0	0	0	16	0	0	0	0	0	0
71	37.5	2.5	2	0	1	0	0	0	0	0	0	0	32	0	16	0	0	0	0	0	0	0
72	37.5	7.5	0	0	0	0	0	0	0	0	0	0	0	0	0	0	0	0	0	0	0	0
73	37.5	12.5	3	0	0	1	0	0	0	0	0	0	48	0	0	16	0	0	0	0	0	0
74	37.5	17.5	1	0	1	0	0	0	0	0	0	0	16	0	16	0	0	0	0	0	0	0
75	37.5	22.5	0	0	0	1	0	0	0	0	0	0	0	0	0	16	0	0	0	0	0	0
76	37.5	27.5	3	0	1	1	0	0	0	0	0	0	48	0	16	16	0	0	0	0	0	0
77	37.5	32.5	1	0	0	1	0	0	0	0	0	0	16	0	0	16	0	0	0	0	0	0
78	37.5	37.5	0	0	0	0	0	0	0	0	0	0	0	0	0	0	0	0	0	0	0	0
79	37.5	42.5	2	0	0	2	0	0	1	0	0	0	32	0	0	32	0	0	16	0	0	0
80	37.5	47.5	2	0	1	1	0	0	1	0	0	0	32	0	16	16	0	0	16	0	0	0
81	42.5	2.5	0	0	1	1	0	0	0	0	0	0	0	0	16	16	0	0	0	0	0	0
82	42.5	7.5	4	0	0	0	0	0	0	0	0	0	64	0	0	0	0	0	0	0	0	0
83	42.5	12.5	2	1	1	1	0	0	2	0	0	0	32	16	16	16	0	0	32	0	0	0
84	42.5	17.5	1	0	0	0	0	0	0	0	0	0	16	0	0	0	0	0	0	0	0	0
85	42.5	22.5	6	0	0	2	0	0	0	0	0	0	96	0	0	32	0	0	0	0	0	0
86	42.5	27.5	5	0	1	1	0	0	0	0	0	0	80	0	16	16	0	0	0	0	0	0
87	42.5	32.5	28	0	0	1	0	0	1	1	0	0	448	0	0	16	0	0	16	16	0	0
88	42.5	37.5	8	0	4	0	0	0	0	0	0	0	128	0	64	0	0	0	0	0	0	0
89	42.5	42.5	4	1	0	1	0	0	0	0	0	0	64	16	0	16	0	0	0	0	0	0
90	42.5	47.5	2	0	0	0	0	0	0	0	0	0	32	0	0	0	0	0	0	0	0	0
91	47.5	2.5	2	0	2	0	0	0	0	0	0	0	32	0	32	0	0	0	0	0	0	0
92	47.5	7.5	2	0	0	1	0	0	0	0	0	0	32	0	0	16	0	0	0	0	0	0
93	47.5	12.5	0	0	0	0	0	0	0	0	0	0	0	0	0	0	0	0	0	0	0	0
94	47.5	17.5	2	0	0	1	0	0	0	0	0	0	32	0	0	16	0	0	0	0	0	0
95	47.5	22.5	2	0	0	3	0	0	0	0	0	0	32	0	0	48	0	0	0	0	0	0
96	47.5	27.5	6	1	0	0	0	0	0	0	0	0	96	16	0	0	0	0	0	0	0	0
97	47.5	32.5	5	0	1	2	0	0	0	0	0	0	80	0	16	32	0	0	0	0	0	0
98	47.5	37.5	8	0	0	0	0	0	0	0	0	0	128	0	0	0	0	0	0	0	0	0
99	47.5	42.5	0	1	0	2	0	0	0	0	0	0	0	16	0	32	0	0	0	0	0	0
100	47.5	47.5	1	0	1	2	0	0	0	0	0	0	16	0	16	32	0	0	0	0	0	0

## Sheet: Grass savanna - November 1995
			counts: individuals per sampling unit	counts: individuals per sampling unit	counts: individuals per sampling unit	counts: individuals per sampling unit	counts: individuals per sampling unit	counts: individuals per sampling unit	counts: individuals per sampling unit	counts: individuals per sampling unit	counts: individuals per sampling unit	counts: individuals per sampling unit	abundance: individuals per m2	abundance: individuals per m2	abundance: individuals per m2	abundance: individuals per m2	abundance: individuals per m2	abundance: individuals per m2	abundance: individuals per m2	abundance: individuals per m2	abundance: individuals per m2	abundance: individuals per m2
sampling point	x coordinates (m)	y coordinates (m)	Eudriliae	Millsonia anomala (adults)	Millsonia anomala (subadults)	Millsonia anomala (juveniles)	Millsonia anomala (cocoons)	Dichogaster agilis (adults)	Dichogaster agilis (subadults)	Dichogaster agilis (juveniles)	Agastrodrilus sp.	other	Eudriliae	Millsonia anomala (adults)	Millsonia anomala (subadults)	Millsonia anomala (juveniles)	Millsonia anomala (cocoons)	Dichogaster agilis (adults)	Dichogaster agilis (subadults)	Dichogaster agilis (juveniles)	Agastrodrilus sp.	other
1	2.5	2.5	3	0	4	0	0	0	0	0	0	0	48	0	64	0	0	0	0	0	0	0
2	2.5	7.5	13	0	1	0	0	0	0	0	0	0	208	0	16	0	0	0	0	0	0	0
3	2.5	12.5	5	1	4	0	0	0	0	0	0	0	80	16	64	0	0	0	0	0	0	0
4	2.5	17.5	4	0	1	0	0	0	0	2	0	0	64	0	16	0	0	0	0	32	0	0
5	2.5	22.5	9	0	4	3	0	0	0	1	0	0	144	0	64	48	0	0	0	16	0	0
6	2.5	27.5	9	0	2	0	0	0	0	4	0	0	144	0	32	0	0	0	0	64	0	0
7	2.5	32.5	17	0	0	0	0	0	0	0	0	0	272	0	0	0	0	0	0	0	0	0
8	2.5	37.5	11	0	2	0	0	0	0	0	0	0	176	0	32	0	0	0	0	0	0	0
9	2.5	42.5	9	0	2	0	0	0	0	1	0	0	144	0	32	0	0	0	0	16	0	0
10	2.5	47.5	9	0	2	0	0	0	0	0	0	0	144	0	32	0	0	0	0	0	0	0
11	7.5	2.5	7	1	3	0	0	0	0	0	0	0	112	16	48	0	0	0	0	0	0	0
12	7.5	7.5	8	0	2	0	0	0	0	0	0	0	128	0	32	0	0	0	0	0	0	0
13	7.5	12.5	10	0	2	1	0	0	0	1	0	0	160	0	32	16	0	0	0	16	0	0
14	7.5	17.5	11	0	2	2	0	0	0	1	0	0	176	0	32	32	0	0	0	16	0	0
15	7.5	22.5	9	1	3	2	0	0	0	2	0	0	144	16	48	32	0	0	0	32	0	0
16	7.5	27.5	9	0	1	0	1	0	0	1	0	0	144	0	16	0	16	0	0	16	0	0
17	7.5	32.5	13	0	6	0	0	0	0	2	0	0	208	0	96	0	0	0	0	32	0	0
18	7.5	37.5	11	0	0	2	1	0	0	0	0	0	176	0	0	32	16	0	0	0	0	0
19	7.5	42.5	6	0	2	0	0	0	0	1	0	0	96	0	32	0	0	0	0	16	0	0
20	7.5	47.5	9	0	4	0	1	0	0	1	0	0	144	0	64	0	16	0	0	16	0	0
21	12.5	2.5	8	0	7	0	0	0	0	0	0	0	128	0	112	0	0	0	0	0	0	0
22	12.5	7.5	4	2	4	0	0	0	0	0	0	0	64	32	64	0	0	0	0	0	0	0
23	12.5	12.5	8	1	1	1	0	0	0	2	0	0	128	16	16	16	0	0	0	32	0	0
24	12.5	17.5	4	1	0	1	0	0	0	0	0	0	64	16	0	16	0	0	0	0	0	0
25	12.5	22.5	4	0	4	0	0	0	0	0	0	0	64	0	64	0	0	0	0	0	0	0
26	12.5	27.5	3	0	3	1	1	0	0	1	0	0	48	0	48	16	16	0	0	16	0	0
27	12.5	32.5	6	0	3	0	0	0	0	3	0	0	96	0	48	0	0	0	0	48	0	0
28	12.5	37.5	6	0	1	3	0	0	0	0	0	0	96	0	16	48	0	0	0	0	0	0
29	12.5	42.5	3	0	1	2	0	0	0	0	0	0	48	0	16	32	0	0	0	0	0	0
30	12.5	47.5	3	0	1	2	0	0	0	0	0	0	48	0	16	32	0	0	0	0	0	0
31	17.5	2.5	3	0	1	0	1	0	0	0	0	0	48	0	16	0	16	0	0	0	0	0
32	17.5	7.5	5	0	2	0	0	0	0	0	0	0	80	0	32	0	0	0	0	0	0	0
33	17.5	12.5	7	0	3	1	0	0	0	2	0	0	112	0	48	16	0	0	0	32	0	0
34	17.5	17.5	2	2	0	0	1	0	0	0	0	0	32	32	0	0	16	0	0	0	0	0
35	17.5	22.5	9	0	2	1	0	0	0	1	0	0	144	0	32	16	0	0	0	16	0	0
36	17.5	27.5	6	1	1	0	0	0	0	0	0	0	96	16	16	0	0	0	0	0	0	0
37	17.5	32.5	7	0	0	2	0	0	0	0	0	0	112	0	0	32	0	0	0	0	0	0
38	17.5	37.5	3	0	2	2	0	0	0	0	0	0	48	0	32	32	0	0	0	0	0	0
39	17.5	42.5	11	2	0	1	0	0	0	1	0	0	176	32	0	16	0	0	0	16	0	0
40	17.5	47.5	6	1	0	6	2	0	0	1	0	0	96	16	0	96	32	0	0	16	0	0
41	22.5	2.5	12	0	1	2	1	0	0	0	0	0	192	0	16	32	16	0	0	0	0	0
42	22.5	7.5	5	0	0	3	0	0	0	0	0	0	80	0	0	48	0	0	0	0	0	0
43	22.5	12.5	2	0	1	8	1	0	0	0	0	0	32	0	16	128	16	0	0	0	0	0
44	22.5	17.5	5	0	1	3	0	0	0	0	0	0	80	0	16	48	0	0	0	0	0	0
45	22.5	22.5	2	0	0	2	0	0	0	0	0	0	32	0	0	32	0	0	0	0	0	0
46	22.5	27.5	5	0	0	5	1	0	0	0	0	0	80	0	0	80	16	0	0	0	0	0
47	22.5	32.5	4	0	1	0	0	0	0	0	0	0	64	0	16	0	0	0	0	0	0	0
48	22.5	37.5	6	0	5	0	0	0	0	2	0	0	96	0	80	0	0	0	0	32	0	0
49	22.5	42.5	4	0	0	3	0	0	0	1	0	0	64	0	0	48	0	0	0	16	0	0
50	22.5	47.5	3	0	0	4	0	0	0	1	0	0	48	0	0	64	0	0	0	16	0	0
51	27.5	2.5	3	2	0	2	0	0	0	0	0	0	48	32	0	32	0	0	0	0	0	0
52	27.5	7.5	5	0	1	3	0	0	0	0	0	0	80	0	16	48	0	0	0	0	0	0
53	27.5	12.5	7	2	0	0	1	0	0	0	0	0	112	32	0	0	16	0	0	0	0	0
54	27.5	17.5	9	1	1	4	0	0	0	3	0	0	144	16	16	64	0	0	0	48	0	0
55	27.5	22.5	3	0	0	1	0	0	0	0	0	0	48	0	0	16	0	0	0	0	0	0
56	27.5	27.5	5	0	1	1	0	0	0	1	0	0	80	0	16	16	0	0	0	16	0	0
57	27.5	32.5	9	0	1	0	0	0	0	0	0	0	144	0	16	0	0	0	0	0	0	0
58	27.5	37.5	8	0	0	2	0	0	0	0	0	0	128	0	0	32	0	0	0	0	0	0
59	27.5	42.5	4	0	0	1	0	0	0	1	0	0	64	0	0	16	0	0	0	16	0	0
60	27.5	47.5	3	1	2	0	1	0	0	0	0	0	48	16	32	0	16	0	0	0	0	0
61	32.5	2.5	4	0	2	0	1	0	0	0	0	0	64	0	32	0	16	0	0	0	0	0
62	32.5	7.5	3	0	0	2	0	0	0	1	0	0	48	0	0	32	0	0	0	16	0	0
63	32.5	12.5	5	0	3	2	0	0	0	1	0	0	80	0	48	32	0	0	0	16	0	0
64	32.5	17.5	8	0	0	2	1	0	0	0	0	0	128	0	0	32	16	0	0	0	0	0
65	32.5	22.5	4	1	0	3	0	0	0	0	0	0	64	16	0	48	0	0	0	0	0	0
66	32.5	27.5	5	0	0	1	0	0	0	0	0	0	80	0	0	16	0	0	0	0	0	0
67	32.5	32.5	14	0	0	1	0	0	0	0	0	0	224	0	0	16	0	0	0	0	0	0
68	32.5	37.5	9	0	2	1	0	0	0	2	0	0	144	0	32	16	0	0	0	32	0	0
69	32.5	42.5	5	0	2	0	0	0	0	0	0	0	80	0	32	0	0	0	0	0	0	0
70	32.5	47.5	7	0	0	1	0	0	0	1	0	0	112	0	0	16	0	0	0	16	0	0
71	37.5	2.5	11	1	1	3	1	0	0	0	0	0	176	16	16	48	16	0	0	0	0	0
72	37.5	7.5	7	0	2	2	0	0	0	0	0	0	112	0	32	32	0	0	0	0	0	0
73	37.5	12.5	5	0	2	0	1	0	1	0	0	0	80	0	32	0	16	0	16	0	0	0
74	37.5	17.5	8	2	0	3	0	0	2	0	0	0	128	32	0	48	0	0	32	0	0	0
75	37.5	22.5	7	1	1	4	0	0	0	0	0	0	112	16	16	64	0	0	0	0	0	0
76	37.5	27.5	20	1	0	0	0	0	0	1	0	0	320	16	0	0	0	0	0	16	0	0
77	37.5	32.5	9	0	0	1	0	0	0	1	0	0	144	0	0	16	0	0	0	16	0	0
78	37.5	37.5	8	0	0	0	0	0	0	2	0	0	128	0	0	0	0	0	0	32	0	0
79	37.5	42.5	7	0	2	2	0	0	1	0	0	0	112	0	32	32	0	0	16	0	0	0
80	37.5	47.5	3	0	0	0	0	0	0	0	0	0	48	0	0	0	0	0	0	0	0	0
81	42.5	2.5	6	0	0	3	0	0	0	0	0	0	96	0	0	48	0	0	0	0	0	0
82	42.5	7.5	5	0	2	0	0	0	0	0	0	0	80	0	32	0	0	0	0	0	0	0
83	42.5	12.5	4	0	3	1	0	0	0	1	0	0	64	0	48	16	0	0	0	16	0	0
84	42.5	17.5	4	0	2	2	1	0	1	0	0	0	64	0	32	32	16	0	16	0	0	0
85	42.5	22.5	9	0	1	0	0	0	1	1	0	0	144	0	16	0	0	0	16	16	0	0
86	42.5	27.5	14	0	0	1	0	0	0	1	0	0	224	0	0	16	0	0	0	16	0	0
87	42.5	32.5	9	0	2	0	0	0	0	0	0	0	144	0	32	0	0	0	0	0	0	0
88	42.5	37.5	5	0	0	1	0	0	3	2	0	0	80	0	0	16	0	0	48	32	0	0
89	42.5	42.5	4	0	2	3	0	0	0	1	0	0	64	0	32	48	0	0	0	16	0	0
90	42.5	47.5	3	1	0	5	0	0	0	1	0	0	48	16	0	80	0	0	0	16	0	0
91	47.5	2.5	1	0	2	0	0	0	0	0	0	0	16	0	32	0	0	0	0	0	0	0
92	47.5	7.5	1	0	3	2	0	0	0	0	0	0	16	0	48	32	0	0	0	0	0	0
93	47.5	12.5	2	0	0	1	1	0	0	0	0	0	32	0	0	16	16	0	0	0	0	0
94	47.5	17.5	8	1	3	3	0	0	2	0	0	0	128	16	48	48	0	0	32	0	0	0
95	47.5	22.5	9	0	2	0	0	0	0	0	0	0	144	0	32	0	0	0	0	0	0	0
96	47.5	27.5	8	0	0	2	0	0	0	0	0	0	128	0	0	32	0	0	0	0	0	0
97	47.5	32.5	13	0	1	1	0	0	0	1	0	0	208	0	16	16	0	0	0	16	0	0
98	47.5	37.5	17	0	0	1	0	0	0	0	0	0	272	0	0	16	0	0	0	0	0	0
99	47.5	42.5	31	2	0	2	0	0	1	0	0	0	496	32	0	32	0	0	16	0	0	0
100	47.5	47.5	9	0	0	3	0	0	0	0	0	0	144	0	0	48	0	0	0	0	0	0

## Sheet: Grass savanna - June 1996
			counts: individuals per sampling unit	counts: individuals per sampling unit	counts: individuals per sampling unit	counts: individuals per sampling unit	counts: individuals per sampling unit	counts: individuals per sampling unit	counts: individuals per sampling unit	counts: individuals per sampling unit	counts: individuals per sampling unit	counts: individuals per sampling unit	abundance: individuals per m2	abundance: individuals per m2	abundance: individuals per m2	abundance: individuals per m2	abundance: individuals per m2	abundance: individuals per m2	abundance: individuals per m2	abundance: individuals per m2	abundance: individuals per m2	abundance: individuals per m2
sampling point	x coordinates (m)	y coordinates (m)	Eudriliae	Millsonia anomala (adults)	Millsonia anomala (subadults)	Millsonia anomala (juveniles)	Millsonia anomala (cocoons)	Dichogaster agilis (adults)	Dichogaster agilis (subadults)	Dichogaster agilis (juveniles)	Agastrodrilus sp.	other	Eudriliae	Millsonia anomala (adults)	Millsonia anomala (subadults)	Millsonia anomala (juveniles)	Millsonia anomala (cocoons)	Dichogaster agilis (adults)	Dichogaster agilis (subadults)	Dichogaster agilis (juveniles)	Agastrodrilus sp.	other
1	2.5	2.5	1	1	2	0	0	0	0	0	0	0	16	16	32	0	0	0	0	0	0	0
2	2.5	7.5	5	0	0	0	0	0	0	0	0	0	80	0	0	0	0	0	0	0	0	0
3	2.5	12.5	3	0	0	0	0	0	0	0	0	0	48	0	0	0	0	0	0	0	0	0
4	2.5	17.5	6	2	0	0	0	0	0	1	0	0	96	32	0	0	0	0	0	16	0	0
5	2.5	22.5	8	0	1	0	0	0	0	0	0	0	128	0	16	0	0	0	0	0	0	0
6	2.5	27.5	7	0	0	0	0	0	2	0	0	0	112	0	0	0	0	0	32	0	0	0
7	2.5	32.5	8	0	0	0	0	0	0	0	0	0	128	0	0	0	0	0	0	0	0	0
8	2.5	37.5	6	0	0	0	0	0	1	0	0	0	96	0	0	0	0	0	16	0	0	0
9	2.5	42.5	9	0	0	0	0	0	0	0	0	0	144	0	0	0	0	0	0	0	0	0
10	2.5	47.5	6	0	0	0	0	0	0	0	0	0	96	0	0	0	0	0	0	0	0	0
11	7.5	2.5	12	3	3	0	1	0	0	0	0	0	192	48	48	0	16	0	0	0	0	0
12	7.5	7.5	4	0	1	2	0	0	1	0	0	0	64	0	16	32	0	0	16	0	0	0
13	7.5	12.5	4	0	0	0	0	0	1	0	0	0	64	0	0	0	0	0	16	0	0	0
14	7.5	17.5	4	2	0	3	0	0	0	0	0	0	64	32	0	48	0	0	0	0	0	0
15	7.5	22.5	7	0	0	0	0	0	0	1	0	0	112	0	0	0	0	0	0	16	0	0
16	7.5	27.5	3	0	2	0	0	0	0	0	0	0	48	0	32	0	0	0	0	0	0	0
17	7.5	32.5	6	0	0	2	0	0	1	0	0	0	96	0	0	32	0	0	16	0	0	0
18	7.5	37.5	2	0	0	1	0	0	0	0	0	0	32	0	0	16	0	0	0	0	0	0
19	7.5	42.5	4	0	0	0	0	0	0	1	0	0	64	0	0	0	0	0	0	16	0	0
20	7.5	47.5	4	0	0	0	0	0	1	1	0	0	64	0	0	0	0	0	16	16	0	0
21	12.5	2.5	6	3	0	0	1	0	0	0	0	0	96	48	0	0	16	0	0	0	0	0
22	12.5	7.5	4	0	0	2	0	0	0	1	0	0	64	0	0	32	0	0	0	16	0	0
23	12.5	12.5	3	1	2	0	0	0	0	0	0	0	48	16	32	0	0	0	0	0	0	0
24	12.5	17.5	4	2	1	0	0	0	0	1	0	0	64	32	16	0	0	0	0	16	0	0
25	12.5	22.5	4	0	0	0	0	0	0	0	0	0	64	0	0	0	0	0	0	0	0	0
26	12.5	27.5	13	1	0	3	0	0	2	1	0	0	208	16	0	48	0	0	32	16	0	0
27	12.5	32.5	1	0	0	1	0	0	1	0	0	0	16	0	0	16	0	0	16	0	0	0
28	12.5	37.5	4	0	0	0	0	0	0	0	0	0	64	0	0	0	0	0	0	0	0	0
29	12.5	42.5	0	0	1	0	0	0	0	0	0	0	0	0	16	0	0	0	0	0	0	0
30	12.5	47.5	3	0	0	0	0	0	0	0	0	0	48	0	0	0	0	0	0	0	0	0
31	17.5	2.5	5	0	0	0	0	0	0	0	0	0	80	0	0	0	0	0	0	0	0	0
32	17.5	7.5	2	0	0	0	0	0	0	0	0	0	32	0	0	0	0	0	0	0	0	0
33	17.5	12.5	5	0	2	0	0	0	2	0	0	0	80	0	32	0	0	0	32	0	0	0
34	17.5	17.5	3	0	0	0	0	0	0	0	0	0	48	0	0	0	0	0	0	0	0	0
35	17.5	22.5	2	0	0	0	0	0	0	0	0	0	32	0	0	0	0	0	0	0	0	0
36	17.5	27.5	6	0	1	1	0	0	0	0	0	0	96	0	16	16	0	0	0	0	0	0
37	17.5	32.5	6	0	2	0	0	0	0	0	0	0	96	0	32	0	0	0	0	0	0	0
38	17.5	37.5	2	0	3	1	0	0	0	0	0	0	32	0	48	16	0	0	0	0	0	0
39	17.5	42.5	3	0	1	0	0	0	0	0	0	0	48	0	16	0	0	0	0	0	0	0
40	17.5	47.5	1	2	2	0	0	0	0	0	0	0	16	32	32	0	0	0	0	0	0	0
41	22.5	2.5	1	0	0	0	0	0	0	0	0	0	16	0	0	0	0	0	0	0	0	0
42	22.5	7.5	5	0	0	0	0	0	0	0	0	0	80	0	0	0	0	0	0	0	0	0
43	22.5	12.5	1	0	0	0	0	0	0	0	1	0	16	0	0	0	0	0	0	0	16	0
44	22.5	17.5	3	1	1	0	0	0	0	0	0	0	48	16	16	0	0	0	0	0	0	0
45	22.5	22.5	7	0	0	0	0	0	0	0	0	0	112	0	0	0	0	0	0	0	0	0
46	22.5	27.5	2	0	1	0	0	0	0	1	0	0	32	0	16	0	0	0	0	16	0	0
47	22.5	32.5	3	0	0	0	0	0	0	0	0	0	48	0	0	0	0	0	0	0	0	0
48	22.5	37.5	5	0	0	1	0	0	0	0	0	0	80	0	0	16	0	0	0	0	0	0
49	22.5	42.5	3	0	0	2	0	0	0	0	0	0	48	0	0	32	0	0	0	0	0	0
50	22.5	47.5	3	0	1	0	0	0	0	0	0	0	48	0	16	0	0	0	0	0	0	0
51	27.5	2.5	3	1	1	0	0	0	0	0	0	0	48	16	16	0	0	0	0	0	0	0
52	27.5	7.5	2	0	0	0	0	0	0	0	0	0	32	0	0	0	0	0	0	0	0	0
53	27.5	12.5	4	0	0	0	0	0	0	0	0	0	64	0	0	0	0	0	0	0	0	0
54	27.5	17.5	2	0	0	0	0	0	0	0	0	0	32	0	0	0	0	0	0	0	0	0
55	27.5	22.5	3	0	0	2	0	0	0	0	0	0	48	0	0	32	0	0	0	0	0	0
56	27.5	27.5	2	3	0	0	0	0	0	0	0	0	32	48	0	0	0	0	0	0	0	0
57	27.5	32.5	1	0	0	2	0	0	0	0	0	0	16	0	0	32	0	0	0	0	0	0
58	27.5	37.5	1	0	0	1	0	0	0	1	0	0	16	0	0	16	0	0	0	16	0	0
59	27.5	42.5	3	0	2	0	0	0	0	0	0	0	48	0	32	0	0	0	0	0	0	0
60	27.5	47.5	2	0	1	0	0	0	0	0	0	0	32	0	16	0	0	0	0	0	0	0
61	32.5	2.5	3	0	2	0	0	0	0	0	0	0	48	0	32	0	0	0	0	0	0	0
62	32.5	7.5	1	0	1	1	0	0	0	0	0	0	16	0	16	16	0	0	0	0	0	0
63	32.5	12.5	4	0	1	1	0	0	0	0	0	0	64	0	16	16	0	0	0	0	0	0
64	32.5	17.5	3	2	0	1	0	0	0	0	0	0	48	32	0	16	0	0	0	0	0	0
65	32.5	22.5	9	0	0	0	0	0	0	0	0	0	144	0	0	0	0	0	0	0	0	0
66	32.5	27.5	5	1	0	0	0	0	0	0	0	0	80	16	0	0	0	0	0	0	0	0
67	32.5	32.5	8	1	1	0	0	0	0	0	0	0	128	16	16	0	0	0	0	0	0	0
68	32.5	37.5	8	0	1	1	0	0	0	1	0	0	128	0	16	16	0	0	0	16	0	0
69	32.5	42.5	4	4	0	1	0	0	0	0	0	0	64	64	0	16	0	0	0	0	0	0
70	32.5	47.5	4	0	1	0	0	0	0	0	0	0	64	0	16	0	0	0	0	0	0	0
71	37.5	2.5	3	0	2	1	0	0	0	0	0	0	48	0	32	16	0	0	0	0	0	0
72	37.5	7.5	1	0	0	0	0	0	0	0	0	0	16	0	0	0	0	0	0	0	0	0
73	37.5	12.5	8	0	2	1	0	0	0	0	0	0	128	0	32	16	0	0	0	0	0	0
74	37.5	17.5	4	0	0	1	0	0	0	0	0	0	64	0	0	16	0	0	0	0	0	0
75	37.5	22.5	3	0	1	0	0	0	0	0	0	0	48	0	16	0	0	0	0	0	0	0
76	37.5	27.5	2	0	1	1	0	0	0	0	0	0	32	0	16	16	0	0	0	0	0	0
77	37.5	32.5	6	3	2	1	0	0	0	0	0	0	96	48	32	16	0	0	0	0	0	0
78	37.5	37.5	5	1	1	0	0	0	0	0	0	0	80	16	16	0	0	0	0	0	0	0
79	37.5	42.5	5	1	2	0	0	0	0	0	0	0	80	16	32	0	0	0	0	0	0	0
80	37.5	47.5	2	2	2	3	0	0	0	0	0	0	32	32	32	48	0	0	0	0	0	0
81	42.5	2.5	1	0	1	1	0	0	0	0	0	0	16	0	16	16	0	0	0	0	0	0
82	42.5	7.5	3	0	1	0	0	0	0	0	0	0	48	0	16	0	0	0	0	0	0	0
83	42.5	12.5	1	0	0	0	0	0	0	0	0	0	16	0	0	0	0	0	0	0	0	0
84	42.5	17.5	8	0	1	0	0	0	0	0	0	0	128	0	16	0	0	0	0	0	0	0
85	42.5	22.5	8	0	2	1	0	0	0	0	0	0	128	0	32	16	0	0	0	0	0	0
86	42.5	27.5	5	0	1	2	0	0	0	0	0	0	80	0	16	32	0	0	0	0	0	0
87	42.5	32.5	4	1	2	1	0	0	0	1	0	0	64	16	32	16	0	0	0	16	0	0
88	42.5	37.5	5	1	1	0	0	0	1	1	0	0	80	16	16	0	0	0	16	16	0	0
89	42.5	42.5	4	1	1	2	0	0	0	0	0	0	64	16	16	32	0	0	0	0	0	0
90	42.5	47.5	1	0	1	0	0	0	0	0	0	0	16	0	16	0	0	0	0	0	0	0
91	47.5	2.5	2	0	1	1	0	0	0	0	0	0	32	0	16	16	0	0	0	0	0	0
92	47.5	7.5	0	0	2	0	0	0	0	0	0	0	0	0	32	0	0	0	0	0	0	0
93	47.5	12.5	2	0	0	0	0	0	0	0	0	0	32	0	0	0	0	0	0	0	0	0
94	47.5	17.5	1	0	0	0	0	0	0	0	0	0	16	0	0	0	0	0	0	0	0	0
95	47.5	22.5	1	1	0	0	0	0	0	0	0	0	16	16	0	0	0	0	0	0	0	0
96	47.5	27.5	2	1	0	0	0	0	0	0	0	0	32	16	0	0	0	0	0	0	0	0
97	47.5	32.5	2	2	0	0	0	0	0	0	0	0	32	32	0	0	0	0	0	0	0	0
98	47.5	37.5	2	0	3	1	0	0	1	0	0	0	32	0	48	16	0	0	16	0	0	0
99	47.5	42.5	8	0	1	3	0	0	0	0	0	0	128	0	16	48	0	0	0	0	0	0
100	47.5	47.5	5	1	3	0	0	0	0	0	0	0	80	16	48	0	0	0	0	0	0	0

## Sheet: Grass savanna - December 1996
			counts: individuals per sampling unit	counts: individuals per sampling unit	counts: individuals per sampling unit	counts: individuals per sampling unit	counts: individuals per sampling unit	counts: individuals per sampling unit	counts: individuals per sampling unit	counts: individuals per sampling unit	counts: individuals per sampling unit	counts: individuals per sampling unit	abundance: individuals per m2	abundance: individuals per m2	abundance: individuals per m2	abundance: individuals per m2	abundance: individuals per m2	abundance: individuals per m2	abundance: individuals per m2	abundance: individuals per m2	abundance: individuals per m2	abundance: individuals per m2
sampling point	x coordinates (m)	y coordinates (m)	Eudriliae	Millsonia anomala (adults)	Millsonia anomala (subadults)	Millsonia anomala (juveniles)	Millsonia anomala (cocoons)	Dichogaster agilis (adults)	Dichogaster agilis (subadults)	Dichogaster agilis (juveniles)	Agastrodrilus sp.	other	Eudriliae	Millsonia anomala (adults)	Millsonia anomala (subadults)	Millsonia anomala (juveniles)	Millsonia anomala (cocoons)	Dichogaster agilis (adults)	Dichogaster agilis (subadults)	Dichogaster agilis (juveniles)	Agastrodrilus sp.	other
1	2.5	2.5	2	0	2	0	0	0	0	1	0	0	32	0	32	0	0	0	0	16	0	0
2	2.5	7.5	5	0	0	0	0	0	1	0	0	0	80	0	0	0	0	0	16	0	0	0
3	2.5	12.5	0	0	0	1	0	0	0	0	0	0	0	0	0	16	0	0	0	0	0	0
4	2.5	17.5	7	0	0	0	0	0	0	0	0	0	112	0	0	0	0	0	0	0	0	0
5	2.5	22.5	1	0	1	2	0	0	0	0	0	0	16	0	16	32	0	0	0	0	0	0
6	2.5	27.5	0	0	0	0	0	0	1	1	0	0	0	0	0	0	0	0	16	16	0	0
7	2.5	32.5	6	0	0	0	1	0	0	0	0	0	96	0	0	0	16	0	0	0	0	0
8	2.5	37.5	3	0	0	1	0	0	0	0	0	0	48	0	0	16	0	0	0	0	0	0
9	2.5	42.5	5	0	0	0	0	0	0	1	0	0	80	0	0	0	0	0	0	16	0	0
10	2.5	47.5	6	0	1	2	0	0	0	1	0	0	96	0	16	32	0	0	0	16	0	0
11	7.5	2.5	0	0	0	1	0	0	0	1	0	0	0	0	0	16	0	0	0	16	0	0
12	7.5	7.5	0	0	3	3	0	0	0	0	0	0	0	0	48	48	0	0	0	0	0	0
13	7.5	12.5	1	0	1	0	0	0	0	2	0	0	16	0	16	0	0	0	0	32	0	0
14	7.5	17.5	2	0	0	0	0	0	1	0	0	0	32	0	0	0	0	0	16	0	0	0
15	7.5	22.5	5	0	0	1	0	0	0	0	0	0	80	0	0	16	0	0	0	0	0	0
16	7.5	27.5	5	0	0	1	0	0	0	1	0	0	80	0	0	16	0	0	0	16	0	0
17	7.5	32.5	3	1	0	1	1	0	0	0	0	0	48	16	0	16	16	0	0	0	0	0
18	7.5	37.5	7	1	1	0	3	0	1	0	0	0	112	16	16	0	48	0	16	0	0	0
19	7.5	42.5	2	0	0	4	0	0	0	1	0	0	32	0	0	64	0	0	0	16	0	0
20	7.5	47.5	5	0	1	2	0	0	0	1	0	0	80	0	16	32	0	0	0	16	0	0
21	12.5	2.5	0	0	0	1	0	0	0	0	0	0	0	0	0	16	0	0	0	0	0	0
22	12.5	7.5	1	0	1	0	0	0	0	1	0	0	16	0	16	0	0	0	0	16	0	0
23	12.5	12.5	6	0	3	1	0	0	0	0	0	0	96	0	48	16	0	0	0	0	0	0
24	12.5	17.5	2	0	4	0	0	0	0	1	0	0	32	0	64	0	0	0	0	16	0	0
25	12.5	22.5	3	1	1	3	0	0	0	0	0	0	48	16	16	48	0	0	0	0	0	0
26	12.5	27.5	0	0	0	1	0	0	0	0	0	0	0	0	0	16	0	0	0	0	0	0
27	12.5	32.5	1	0	0	0	0	0	0	1	0	0	16	0	0	0	0	0	0	16	0	0
28	12.5	37.5	2	0	2	0	0	0	0	0	0	0	32	0	32	0	0	0	0	0	0	0
29	12.5	42.5	3	0	2	1	0	0	0	0	0	0	48	0	32	16	0	0	0	0	0	0
30	12.5	47.5	1	0	0	0	0	0	0	0	0	0	16	0	0	0	0	0	0	0	0	0
31	17.5	2.5	0	0	0	0	0	0	0	0	0	0	0	0	0	0	0	0	0	0	0	0
32	17.5	7.5	1	1	2	2	0	0	0	2	0	0	16	16	32	32	0	0	0	32	0	0
33	17.5	12.5	3	2	0	0	0	0	0	1	0	0	48	32	0	0	0	0	0	16	0	0
34	17.5	17.5	0	0	0	0	0	0	0	0	0	0	0	0	0	0	0	0	0	0	0	0
35	17.5	22.5	0	0	0	2	2	0	0	1	0	0	0	0	0	32	32	0	0	16	0	0
36	17.5	27.5	1	0	0	1	0	0	0	0	0	0	16	0	0	16	0	0	0	0	0	0
37	17.5	32.5	0	1	0	3	0	0	0	1	0	0	0	16	0	48	0	0	0	16	0	0
38	17.5	37.5	0	0	0	1	2	0	0	0	0	0	0	0	0	16	32	0	0	0	0	0
39	17.5	42.5	0	1	1	1	0	0	0	0	0	0	0	16	16	16	0	0	0	0	0	0
40	17.5	47.5	0	0	0	1	0	0	0	0	0	0	0	0	0	16	0	0	0	0	0	0
41	22.5	2.5	0	0	1	2	0	0	0	1	0	0	0	0	16	32	0	0	0	16	0	0
42	22.5	7.5	1	0	0	1	0	0	0	1	0	0	16	0	0	16	0	0	0	16	0	0
43	22.5	12.5	5	0	1	0	0	0	0	0	0	0	80	0	16	0	0	0	0	0	0	0
44	22.5	17.5	0	0	0	2	0	0	0	0	0	0	0	0	0	32	0	0	0	0	0	0
45	22.5	22.5	2	0	4	2	0	0	0	0	0	0	32	0	64	32	0	0	0	0	0	0
46	22.5	27.5	0	0	0	1	0	0	0	1	0	0	0	0	0	16	0	0	0	16	0	0
47	22.5	32.5	5	0	0	0	0	0	0	0	0	0	80	0	0	0	0	0	0	0	0	0
48	22.5	37.5	0	0	5	0	0	0	0	2	0	0	0	0	80	0	0	0	0	32	0	0
49	22.5	42.5	2	0	1	2	0	0	0	0	0	0	32	0	16	32	0	0	0	0	0	0
50	22.5	47.5	1	0	0	0	0	0	0	2	0	0	16	0	0	0	0	0	0	32	0	0
51	27.5	2.5	1	0	0	2	0	0	0	0	0	0	16	0	0	32	0	0	0	0	0	0
52	27.5	7.5	0	0	0	1	0	0	0	0	0	0	0	0	0	16	0	0	0	0	0	0
53	27.5	12.5	0	0	0	1	0	0	0	0	0	0	0	0	0	16	0	0	0	0	0	0
54	27.5	17.5	0	0	0	4	0	0	0	0	0	0	0	0	0	64	0	0	0	0	0	0
55	27.5	22.5	0	0	0	5	0	0	0	1	0	0	0	0	0	80	0	0	0	16	0	0
56	27.5	27.5	0	0	0	4	0	0	0	3	0	0	0	0	0	64	0	0	0	48	0	0
57	27.5	32.5	0	0	1	3	0	0	0	1	0	0	0	0	16	48	0	0	0	16	0	0
58	27.5	37.5	1	0	0	0	0	0	0	0	0	0	16	0	0	0	0	0	0	0	0	0
59	27.5	42.5	2	0	0	0	0	0	0	1	0	0	32	0	0	0	0	0	0	16	0	0
60	27.5	47.5	3	0	0	3	1	0	0	2	0	0	48	0	0	48	16	0	0	32	0	0
61	32.5	2.5	0	1	2	2	0	0	0	1	0	0	0	16	32	32	0	0	0	16	0	0
62	32.5	7.5	0	0	0	1	0	0	0	2	0	0	0	0	0	16	0	0	0	32	0	0
63	32.5	12.5	1	0	0	5	0	0	0	1	0	0	16	0	0	80	0	0	0	16	0	0
64	32.5	17.5	0	0	0	4	0	0	0	3	0	0	0	0	0	64	0	0	0	48	0	0
65	32.5	22.5	1	1	0	2	0	0	0	0	0	0	16	16	0	32	0	0	0	0	0	0
66	32.5	27.5	2	0	0	2	0	0	0	0	0	0	32	0	0	32	0	0	0	0	0	0
67	32.5	32.5	3	0	1	0	0	0	0	0	0	0	48	0	16	0	0	0	0	0	0	0
68	32.5	37.5	2	0	1	4	0	0	0	1	0	0	32	0	16	64	0	0	0	16	0	0
69	32.5	42.5	2	1	0	1	0	0	0	1	0	0	32	16	0	16	0	0	0	16	0	0
70	32.5	47.5	5	0	1	2	0	0	0	3	0	0	80	0	16	32	0	0	0	48	0	0
71	37.5	2.5	0	0	0	2	0	0	0	0	0	0	0	0	0	32	0	0	0	0	0	0
72	37.5	7.5	0	0	0	1	0	0	0	0	0	0	0	0	0	16	0	0	0	0	0	0
73	37.5	12.5	0	0	0	3	0	0	0	0	0	0	0	0	0	48	0	0	0	0	0	0
74	37.5	17.5	0	0	0	1	0	0	0	0	0	0	0	0	0	16	0	0	0	0	0	0
75	37.5	22.5	1	0	0	0	1	0	0	0	0	0	16	0	0	0	16	0	0	0	0	0
76	37.5	27.5	3	0	0	0	0	0	0	1	0	0	48	0	0	0	0	0	0	16	0	0
77	37.5	32.5	19	2	2	1	1	0	5	0	0	0	304	32	32	16	16	0	80	0	0	0
78	37.5	37.5	3	0	0	0	0	0	2	1	0	0	48	0	0	0	0	0	32	16	0	0
79	37.5	42.5	4	0	0	2	0	0	0	1	0	0	64	0	0	32	0	0	0	16	0	0
80	37.5	47.5	2	0	0	3	1	0	0	1	0	0	32	0	0	48	16	0	0	16	0	0
81	42.5	2.5	0	0	0	0	0	0	0	0	0	0	0	0	0	0	0	0	0	0	0	0
82	42.5	7.5	0	1	0	3	0	0	0	2	0	0	0	16	0	48	0	0	0	32	0	0
83	42.5	12.5	0	0	0	0	0	0	0	1	0	0	0	0	0	0	0	0	0	16	0	0
84	42.5	17.5	0	0	0	0	0	0	0	1	0	0	0	0	0	0	0	0	0	16	0	0
85	42.5	22.5	16	0	0	0	0	0	0	0	0	0	256	0	0	0	0	0	0	0	0	0
86	42.5	27.5	7	0	0	2	0	0	1	0	0	0	112	0	0	32	0	0	16	0	0	0
87	42.5	32.5	7	0	0	1	0	0	0	1	0	0	112	0	0	16	0	0	0	16	0	0
88	42.5	37.5	9	0	1	0	1	0	0	0	0	0	144	0	16	0	16	0	0	0	0	0
89	42.5	42.5	3	0	1	1	0	0	0	0	0	0	48	0	16	16	0	0	0	0	0	0
90	42.5	47.5	1	0	0	1	0	0	1	0	0	0	16	0	0	16	0	0	16	0	0	0
91	47.5	2.5	0	0	0	0	0	0	0	0	0	0	0	0	0	0	0	0	0	0	0	0
92	47.5	7.5	0	0	0	3	0	0	0	2	0	0	0	0	0	48	0	0	0	32	0	0
93	47.5	12.5	0	0	0	1	0	0	0	0	0	0	0	0	0	16	0	0	0	0	0	0
94	47.5	17.5	2	0	0	1	0	0	0	0	0	0	32	0	0	16	0	0	0	0	0	0
95	47.5	22.5	2	0	0	3	0	0	0	1	0	0	32	0	0	48	0	0	0	16	0	0
96	47.5	27.5	0	0	2	0	0	0	0	0	0	0	0	0	32	0	0	0	0	0	0	0
97	47.5	32.5	10	1	0	0	1	0	1	3	0	0	160	16	0	0	16	0	16	48	0	0
98	47.5	37.5	16	0	0	0	0	0	0	1	0	0	256	0	0	0	0	0	0	16	0	0
99	47.5	42.5	19	0	1	0	0	0	0	2	0	0	304	0	16	0	0	0	0	32	0	0
100	47.5	47.5	7	0	2	2	0	0	0	0	0	0	112	0	32	32	0	0	0	0	0	0

## Sheet: Grass savanna - June 1997
			counts: individuals per sampling unit	counts: individuals per sampling unit	counts: individuals per sampling unit	counts: individuals per sampling unit	counts: individuals per sampling unit	counts: individuals per sampling unit	counts: individuals per sampling unit	counts: individuals per sampling unit	counts: individuals per sampling unit	counts: individuals per sampling unit	abundance: individuals per m2	abundance: individuals per m2	abundance: individuals per m2	abundance: individuals per m2	abundance: individuals per m2	abundance: individuals per m2	abundance: individuals per m2	abundance: individuals per m2	abundance: individuals per m2	abundance: individuals per m2
sampling point	x coordinates (m)	y coordinates (m)	Eudriliae	Millsonia anomala (adults)	Millsonia anomala (subadults)	Millsonia anomala (juveniles)	Millsonia anomala (cocoons)	Dichogaster agilis (adults)	Dichogaster agilis (subadults)	Dichogaster agilis (juveniles)	Agastrodrilus sp.	other	Eudriliae	Millsonia anomala (adults)	Millsonia anomala (subadults)	Millsonia anomala (juveniles)	Millsonia anomala (cocoons)	Dichogaster agilis (adults)	Dichogaster agilis (subadults)	Dichogaster agilis (juveniles)	Agastrodrilus sp.	other
1	2.5	2.5	0	0	1	0	0	0	0	0	0	0	0	0	16	0	0	0	0	0	0	0
2	2.5	7.5	1	4	1	1	0	0	0	0	0	0	16	64	16	16	0	0	0	0	0	0
3	2.5	12.5	3	0	0	4	1	0	0	0	0	0	48	0	0	64	16	0	0	0	0	0
4	2.5	17.5	0	1	0	1	0	0	0	0	0	0	0	16	0	16	0	0	0	0	0	0
5	2.5	22.5	0	0	2	1	0	0	0	0	0	0	0	0	32	16	0	0	0	0	0	0
6	2.5	27.5	0	0	0	0	0	0	0	0	0	0	0	0	0	0	0	0	0	0	0	0
7	2.5	32.5	7	0	0	0	0	0	0	0	0	0	112	0	0	0	0	0	0	0	0	0
8	2.5	37.5	0	0	0	1	0	0	1	0	0	0	0	0	0	16	0	0	16	0	0	0
9	2.5	42.5	3	2	0	1	0	0	0	0	0	0	48	32	0	16	0	0	0	0	0	0
10	2.5	47.5	0	0	0	1	0	0	0	0	0	0	0	0	0	16	0	0	0	0	0	0
11	7.5	2.5	1	0	0	1	0	0	0	0	0	0	16	0	0	16	0	0	0	0	0	0
12	7.5	7.5	0	0	1	0	0	0	0	0	0	0	0	0	16	0	0	0	0	0	0	0
13	7.5	12.5	0	0	0	1	0	0	2	0	0	0	0	0	0	16	0	0	32	0	0	0
14	7.5	17.5	0	2	0	0	0	0	0	1	0	0	0	32	0	0	0	0	0	16	0	0
15	7.5	22.5	1	0	2	1	0	0	0	0	0	0	16	0	32	16	0	0	0	0	0	0
16	7.5	27.5	2	0	0	0	0	0	0	1	0	0	32	0	0	0	0	0	0	16	0	0
17	7.5	32.5	2	4	1	1	0	0	0	0	0	0	32	64	16	16	0	0	0	0	0	0
18	7.5	37.5	2	0	0	0	0	0	0	0	0	0	32	0	0	0	0	0	0	0	0	0
19	7.5	42.5	4	1	0	2	0	0	0	0	0	0	64	16	0	32	0	0	0	0	0	0
20	7.5	47.5	0	0	0	1	0	0	0	0	0	0	0	0	0	16	0	0	0	0	0	0
21	12.5	2.5	1	3	0	0	0	0	0	0	0	0	16	48	0	0	0	0	0	0	0	0
22	12.5	7.5	2	0	0	1	0	0	0	0	0	0	32	0	0	16	0	0	0	0	0	0
23	12.5	12.5	1	2	2	0	0	0	1	0	0	0	16	32	32	0	0	0	16	0	0	0
24	12.5	17.5	2	0	0	1	0	0	0	0	0	0	32	0	0	16	0	0	0	0	0	0
25	12.5	22.5	0	0	1	3	0	0	0	0	0	0	0	0	16	48	0	0	0	0	0	0
26	12.5	27.5	2	2	0	0	0	0	0	1	0	0	32	32	0	0	0	0	0	16	0	0
27	12.5	32.5	1	0	1	0	0	0	0	0	0	0	16	0	16	0	0	0	0	0	0	0
28	12.5	37.5	3	2	1	1	0	0	0	0	0	0	48	32	16	16	0	0	0	0	0	0
29	12.5	42.5	1	1	1	3	0	0	0	0	0	0	16	16	16	48	0	0	0	0	0	0
30	12.5	47.5	0	0	0	0	0	0	0	0	0	0	0	0	0	0	0	0	0	0	0	0
31	17.5	2.5	2	4	3	2	0	0	0	0	0	0	32	64	48	32	0	0	0	0	0	0
32	17.5	7.5	0	5	0	1	0	0	0	0	0	0	0	80	0	16	0	0	0	0	0	0
33	17.5	12.5	2	1	0	0	0	0	0	0	0	0	32	16	0	0	0	0	0	0	0	0
34	17.5	17.5	0	0	0	1	0	0	0	0	0	0	0	0	0	16	0	0	0	0	0	0
35	17.5	22.5	0	0	0	2	0	0	0	0	0	0	0	0	0	32	0	0	0	0	0	0
36	17.5	27.5	2	2	0	5	0	0	0	1	0	0	32	32	0	80	0	0	0	16	0	0
37	17.5	32.5	0	0	2	0	0	0	0	0	0	0	0	0	32	0	0	0	0	0	0	0
38	17.5	37.5	1	1	4	0	0	0	0	0	0	0	16	16	64	0	0	0	0	0	0	0
39	17.5	42.5	0	1	0	1	0	0	0	0	0	0	0	16	0	16	0	0	0	0	0	0
40	17.5	47.5	0	1	1	1	0	0	0	0	0	0	0	16	16	16	0	0	0	0	0	0
41	22.5	2.5	0	3	0	2	0	0	0	0	0	0	0	48	0	32	0	0	0	0	0	0
42	22.5	7.5	0	1	2	0	0	0	0	0	0	0	0	16	32	0	0	0	0	0	0	0
43	22.5	12.5	0	0	0	0	0	0	0	1	0	0	0	0	0	0	0	0	0	16	0	0
44	22.5	17.5	0	0	1	1	0	0	0	0	0	0	0	0	16	16	0	0	0	0	0	0
45	22.5	22.5	0	0	0	3	1	0	0	0	0	0	0	0	0	48	16	0	0	0	0	0
46	22.5	27.5	0	0	3	3	0	0	0	0	0	0	0	0	48	48	0	0	0	0	0	0
47	22.5	32.5	1	4	0	1	0	0	0	0	0	0	16	64	0	16	0	0	0	0	0	0
48	22.5	37.5	0	1	2	2	0	0	0	0	0	0	0	16	32	32	0	0	0	0	0	0
49	22.5	42.5	0	0	2	0	0	0	0	0	0	0	0	0	32	0	0	0	0	0	0	0
50	22.5	47.5	0	0	0	3	0	0	0	0	0	0	0	0	0	48	0	0	0	0	0	0
51	27.5	2.5	1	0	1	3	0	0	0	0	0	0	16	0	16	48	0	0	0	0	0	0
52	27.5	7.5	0	0	0	1	0	0	0	0	0	0	0	0	0	16	0	0	0	0	0	0
53	27.5	12.5	0	0	2	0	0	0	0	0	0	0	0	0	32	0	0	0	0	0	0	0
54	27.5	17.5	0	0	3	0	0	0	0	0	0	0	0	0	48	0	0	0	0	0	0	0
55	27.5	22.5	0	0	0	0	0	0	0	0	0	0	0	0	0	0	0	0	0	0	0	0
56	27.5	27.5	0	1	0	2	0	0	0	0	0	0	0	16	0	32	0	0	0	0	0	0
57	27.5	32.5	0	0	0	2	0	0	0	0	0	0	0	0	0	32	0	0	0	0	0	0
58	27.5	37.5	0	0	0	4	0	0	0	0	0	0	0	0	0	64	0	0	0	0	0	0
59	27.5	42.5	1	0	0	0	0	0	0	0	0	0	16	0	0	0	0	0	0	0	0	0
60	27.5	47.5	1	0	0	2	1	0	0	1	0	0	16	0	0	32	16	0	0	16	0	0
61	32.5	2.5	0	2	0	0	0	0	0	0	0	0	0	32	0	0	0	0	0	0	0	0
62	32.5	7.5	0	5	1	0	0	0	0	0	0	0	0	80	16	0	0	0	0	0	0	0
63	32.5	12.5	1	0	0	0	0	0	0	0	0	0	16	0	0	0	0	0	0	0	0	0
64	32.5	17.5	0	0	0	1	0	0	0	0	0	0	0	0	0	16	0	0	0	0	0	0
65	32.5	22.5	0	0	0	0	0	0	0	0	0	0	0	0	0	0	0	0	0	0	0	0
66	32.5	27.5	0	1	1	1	0	0	0	0	0	0	0	16	16	16	0	0	0	0	0	0
67	32.5	32.5	1	0	0	0	0	0	0	0	0	0	16	0	0	0	0	0	0	0	0	0
68	32.5	37.5	3	2	0	1	0	0	0	0	0	0	48	32	0	16	0	0	0	0	0	0
69	32.5	42.5	1	2	0	2	0	0	0	0	0	0	16	32	0	32	0	0	0	0	0	0
70	32.5	47.5	2	0	0	1	0	0	0	0	0	0	32	0	0	16	0	0	0	0	0	0
71	37.5	2.5	0	0	3	1	0	0	0	0	0	0	0	0	48	16	0	0	0	0	0	0
72	37.5	7.5	0	0	0	1	0	0	0	1	0	0	0	0	0	16	0	0	0	16	0	0
73	37.5	12.5	0	0	0	0	0	0	0	0	0	0	0	0	0	0	0	0	0	0	0	0
74	37.5	17.5	0	1	0	0	0	0	0	0	0	0	0	16	0	0	0	0	0	0	0	0
75	37.5	22.5	0	1	1	0	0	0	0	0	0	0	0	16	16	0	0	0	0	0	0	0
76	37.5	27.5	7	0	0	0	0	0	0	0	0	0	112	0	0	0	0	0	0	0	0	0
77	37.5	32.5	1	0	0	0	0	0	0	0	0	0	16	0	0	0	0	0	0	0	0	0
78	37.5	37.5	0	4	0	0	0	0	1	0	0	0	0	64	0	0	0	0	16	0	0	0
79	37.5	42.5	0	0	0	0	0	0	0	0	0	0	0	0	0	0	0	0	0	0	0	0
80	37.5	47.5	0	2	1	1	0	0	0	0	0	0	0	32	16	16	0	0	0	0	0	0
81	42.5	2.5	0	0	1	1	0	0	0	0	0	0	0	0	16	16	0	0	0	0	0	0
82	42.5	7.5	1	0	0	2	0	0	0	0	0	0	16	0	0	32	0	0	0	0	0	0
83	42.5	12.5	1	0	1	2	0	0	0	0	0	0	16	0	16	32	0	0	0	0	0	0
84	42.5	17.5	4	6	0	1	0	0	0	0	0	0	64	96	0	16	0	0	0	0	0	0
85	42.5	22.5	3	0	0	2	0	0	0	0	0	0	48	0	0	32	0	0	0	0	0	0
86	42.5	27.5	0	0	0	1	0	0	3	0	0	0	0	0	0	16	0	0	48	0	0	0
87	42.5	32.5	1	0	0	0	0	0	0	0	0	0	16	0	0	0	0	0	0	0	0	0
88	42.5	37.5	0	3	0	1	0	0	0	0	0	0	0	48	0	16	0	0	0	0	0	0
89	42.5	42.5	1	1	0	0	0	0	0	0	0	0	16	16	0	0	0	0	0	0	0	0
90	42.5	47.5	0	0	0	0	0	0	0	0	0	0	0	0	0	0	0	0	0	0	0	0
91	47.5	2.5	0	0	1	1	0	0	0	1	0	0	0	0	16	16	0	0	0	16	0	0
92	47.5	7.5	0	0	0	0	0	0	0	0	0	0	0	0	0	0	0	0	0	0	0	0
93	47.5	12.5	0	0	0	0	0	0	0	0	0	0	0	0	0	0	0	0	0	0	0	0
94	47.5	17.5	0	0	0	0	0	0	0	0	0	0	0	0	0	0	0	0	0	0	0	0
95	47.5	22.5	5	2	0	1	0	0	0	0	0	0	80	32	0	16	0	0	0	0	0	0
96	47.5	27.5	0	0	0	0	0	0	0	0	0	0	0	0	0	0	0	0	0	0	0	0
97	47.5	32.5	4	5	1	0	0	0	0	0	0	0	64	80	16	0	0	0	0	0	0	0
98	47.5	37.5	0	0	1	0	0	0	0	0	0	0	0	0	16	0	0	0	0	0	0	0
99	47.5	42.5	2	3	0	1	0	0	0	0	0	0	32	48	0	16	0	0	0	0	0	0
100	47.5	47.5	0	0	0	0	0	0	0	0	1	0	0	0	0	0	0	0	0	0	16	0
